# Supplementary material
Source: PubMed Central journal article supplement (PMC3475408)
Supplement: NIHMS50120-supplement-Movie_Legends.pdf [file NIHMS50120-supplement-Movie_Legends.pdf]

absent (n = 15 – 19 eyes). IPL: inner plexiform layer; INL: inner nuclear layer; GCL: ganglion cell layer; \*\*\* p – value < 0.0002. Error bars indicate standard error of the mean. Scale bars = 20  $\mu$ m.

**Movie 1.** Time-lapse of developing retina revealing the timing and pattern of Barhl2:GFP onset in developing neurons from 35 hpf to 50 hpf (10 min / frame). In this transgenic zebrafish line, post-mitotic *barhl2*-expressing cells first generate GFP as they migrate from the apical edge of the developing retina towards the inner retina. GFP positive cells remain in the future amacrine layer.

**Movie 2.** Time-lapse of developing retina showing the Barhl2:GFP cell generated from asymmetric cell division of an *Atoh7:gap43-RFP* progenitor. The apical surface is up, whereas the basal surface is down. The time-lapse begins with two sister cells (highlighted with white arrows, t = 0h00min) coming from an *atoh7*-expressing progenitor. One of them migrates back to the apical surface where it divides generating one Barhl2:GFP cell, whereas the other sister remains close to the basal surface, differentiating as a retinal ganglion cell (RGC).

**Movie 3.** Time-lapse of developing retina showing premature *barhl2* misexpression in *atoh7*-expressing progenitors. Time lapse was performed from 28 hpf to 40 hpf (6 min / frame). In this transgenic zebrafish line Tg(*atoh7:gal4/pUAS:gap43-GFP*) injected with *pUAS:barhl2-T2A-H2B-RFP* construct, misexpression of *barhl2* (H2B-RFP-positive cells) prematurely in dividing *Atoh7*-positive progenitors apically located was confirmed.

**Movie 4.** Time-lapse of developing retina showing the Barhl2:GFP positive cells derived from asymmetric divisions of two sister cells expressing Atoh7:gap43-RFP in the *lakritz* (*atoh7*<sup>-/-</sup>) mutant. The apical surface is up, whereas the basal surface is down. Every frame corresponds to 5 minutes of the time-lapse. The time-lapse begins with two sister cells (S1 and S2, highlighted with asterisks) coming from an *atoh7*-expressing progenitor. The S1 cell (Sister cell 1) migrates towards the apical surface to divide asymmetrically, generating one Barhl2:GFP-positive (S1a) and one Barhl2:GFP-negative cell (S1b). The S2 cell (Sister cell 2) also migrates towards the apical surface to divide asymmetrically, about 3-4 hours after the cell division of Sister cell 1. The division of Sister cell 2 also generates one Barhl2:GFP-positive (S2a) and one Barhl2:GFP-negative cell (S2b).
